# Supplementary material for: Chinese DLL’s Chinese-English bilingual vocabulary development in the face of discrimination
Source: publisher site journal article supplement (doi:10.1515/applirev-2024-0138), 2025-09-12
Supplement: Supplementary file 1 [file j_applirev-2024-0138_suppl_001.docx]

**Appendix A. Questionnaire items**

**Part I**

**English version:**

**Could you tell us more about YOUR OWN experience DURING the COVID-19 pandemic? Please rate the severity, 5 being very severe.**

1. Someone has actively avoided physical contact with me or my family because of my or my family member's race/ethnicity (e.g., on the street, inviting me to their home).
2. Someone has made a comment about Chinese/Asian people being dirty.
3. Someone has made a comment about Chinese/Asian eating habits (e.g., eating bat soup).
4. I or my family member have been verbally assaulted because of my or my family member's race/ethnicity (e.g., being yelled “go back to China” or “go back to your country”).
5. I or my family member have been physically assaulted because of my or my family member's race/ethnicity.

**Could you tell us more about YOUR OWN experience BEFORE the COVID-19 pandemic? Please rate the severity, 5 being very severe.**

1. Someone has actively avoided physical contact with me or my family because of my or my family member's race/ethnicity (e.g., on the street, inviting me to their home).
2. Someone has made a comment about Chinese/Asian people being dirty.
3. Someone has made a comment about Chinese/Asian eating habits (e.g., eating bat soup).
4. I or my family member have been verbally assaulted because of my or my family member's race/ethnicity (e.g., being yelled “go back to China” or “go back to your country”).
5. I or my family member have been physically assaulted because of my or my family member's race/ethnicity.

**Chinese version:**

**请告诉我们您在COVID-19疫情期间的个人经历。请对严重程度进行评分，5表示非常严重。**

1. 有人因为我或我家人的种族/族裔而主动避免与我或我家人进行身体接触（例如，在街上，邀请我到他们家）。
2. 有人评论中国人/亚洲人不干净。
3. 有人评论中国人/亚洲人的饮食习惯（例如，吃蝙蝠汤）。
4. 我或我的家人因为我或我家人的种族/族裔而遭到言语攻击（例如，被喊“滚回中国”或“滚回你的国家”）。
5. 我或我的家人因为我或我家人的种族/族裔而遭到身体攻击。

**请告诉我们您在COVID-19疫情之前的个人经历。请对严重程度进行评分，5表示非常严重。**

1. 有人因为我或我家人的种族/族裔而主动避免与我或我家人进行身体接触（例如，在街上，邀请我到他们家）。
2. 有人评论中国人/亚洲人不干净。
3. 有人评论中国人/亚洲人的饮食习惯（例如，吃蝙蝠汤）。
4. 我或我的家人因为我或我家人的种族/族裔而遭到言语攻击（例如，被喊“滚回中国”或“滚回你的国家”）。
5. 我或我的家人因为我或我家人的种族/族裔而遭到身体攻击。

**Part II Home language and literacy input**

**English version:**

1. **Child-parent oral language exchange in Chinese .**
2. **Child-parent oral language exchange in English.**

- What language does the MOTHER use when she speaks to the target child?
- What language does the FATHER use when he speaks to the target child?
- What language does your child use when s/he speaks to his/her MOTHER at home?
- What language does your child use when s/he speaks to his/her FATHER at home?

|  | Cannot speak the language | Can speak the language, but never use it | Seldom | 50% | Usually | Almost |
| --- | --- | --- | --- | --- | --- | --- |
| English |  |  |  |  |  |  |
| Mandarin Chinese |  |  |  |  |  |  |
| Other Chinese dialect |  |  |  |  |  |  |

1. **Interactive activities in Chinese.**

- How often does your child do the following activities in CHINESE each week?

|  | Daily | 4-6 times a week | 2-3 times a week | Once a week | Never |
| --- | --- | --- | --- | --- | --- |
| Use computers or iPads or other electronic devices/apps |  |  |  |  |  |
| Watch TV or movies |  |  |  |  |  |
| Sing songs |  |  |  |  |  |

1. **Interactive activities in English.**

- How often does your child do the following activities in ENGLISH each week?

|  | Daily | 4-6 times a week | 2-3 times a week | Once a week | Never |
| --- | --- | --- | --- | --- | --- |
| Use computers or iPads or other electronic devices/apps |  |  |  |  |  |
| Watch TV or movies |  |  |  |  |  |
| Sing songs |  |  |  |  |  |

1. **Code-related teaching in Chinese or English.**

Please respond to the three statements below and indicate your agreement, 1 means strongly disagree; 5 means strongly agree.

- I encourage my child to learn letters in English.
- I encourage my child learning pinyin/bopomofo in Mandarin Chinese.
- I encourage my child to learn Chinese characters.

1. **Child-other adult oral language exchange.**

- What language do other adult(s) (other than mother and father) in the household use when they speak to the target child?
- What language does your child use when s/he speaks to other adult(s) (other than mother and father) in the household?

|  | Cannot speak the language | Can speak the language, but never use it | Seldom | 50% | Usually | Almost |
| --- | --- | --- | --- | --- | --- | --- |
| English |  |  |  |  |  |  |
| Mandarin Chinese |  |  |  |  |  |  |
| Other Chinese dialect |  |  |  |  |  |  |

1. **The number of books at home**

- How many CHINESE books for children are there in your home?

| Almost none | One to ten | Eleven to twenty | Twenty-one to fifty | Over fifty |
| --- | --- | --- | --- | --- |

- How many ENGLISH books for children are there in your home?

| Almost none | One to ten | Eleven to twenty | Twenty-one to fifty | Over fifty |
| --- | --- | --- | --- | --- |

**(8) Casual and school-related reading in Chinese and English.**

- How often do you read to the child in CHINESE for casual/non-school related purposes?

| Never | Once a month | Once a week | Once a day | Several times a day |
| --- | --- | --- | --- | --- |

- How often do you read to the child in CHINESE for schoolwork-related purposes?

| Never | Once a month | Once a week | Once a day | Several times a day |
| --- | --- | --- | --- | --- |

- How often do you read to the child in ENGLISH for casual/non-school related purposes?

| Never | Once a month | Once a week | Once a day | Several times a day |
| --- | --- | --- | --- | --- |

- How often do you read to the child in ENGLISH for schoolwork-related purposes?

| Never | Once a month | Once a week | Once a day | Several times a day |
| --- | --- | --- | --- | --- |

**Chinese version:**

**（1）父母与儿童的中文口语交流 .**

**（2） 儿童与父母的英文口语交流。**

- 当母亲与孩子交谈时，她使用什么语言？
- 父亲在与孩子交谈时使用什么语言？
- 当孩子在家里与他/她的母亲交谈时，他/她会使用什么语言？
- 当孩子在家里与他/她的父亲交谈时，他/她会使用什么语言？

|  | 不会说该语言 | 会说这种语言，但从不使用它 | 很少 | 50% | 通常 | 几乎 |
| --- | --- | --- | --- | --- | --- | --- |
| 英文 |  |  |  |  |  |  |
| 普通话 |  |  |  |  |  |  |
| 其他中文方言 |  |  |  |  |  |  |

**（3） 中文互动活动。**

- 您的孩子每周多久用中文做一次以下活动？

|  | 日常 | 每周 4-6 次 | 每周 2-3 次 | 每周一次 | 从不 |
| --- | --- | --- | --- | --- | --- |
| 使用电脑或 iPad 或其他电子设备/应用程序 |  |  |  |  |  |
| 观看电视或电影 |  |  |  |  |  |
| 唱歌 |  |  |  |  |  |

**（4） 英文互动活动。**

- 您的孩子每周多久用英语做一次以下活动？

|  | 日常 | 每周 4-6 次 | 每周 2-3 次 | 每周一次 | 从不 |
| --- | --- | --- | --- | --- | --- |
| 使用电脑或 iPad 或其他电子设备/应用程序 |  |  |  |  |  |
| 观看电视或电影 |  |  |  |  |  |
| 唱歌 |  |  |  |  |  |

**（5）中文或英文的识字相关教学。**

请回应以下三项陈述并表明：1 表示非常不同意;5 表示非常同意。

- 我鼓励我的孩子学习英文字母。
- 我鼓励我的孩子用普通话学习拼音或者bopomofo。
- 我鼓励我的孩子学习汉字。

**（6）儿童与其他成人的口语交流。**

- 家中的其他成年人（母亲和父亲除外）在与孩子交谈时使用什么语言？
- 当孩子与家中的其他成年人（母亲和父亲除外）交谈时，他/她会使用什么语言？

|  | 不会说该语言 | 会说这种语言，但从不使用它 | 很少 | 50% | 通常 | 几乎 |
| --- | --- | --- | --- | --- | --- | --- |
| 英文 |  |  |  |  |  |  |
| 普通话 |  |  |  |  |  |  |
| 其他中文方言 |  |  |  |  |  |  |

**（7） 家里的书籍数量**

- 您家里有多少本儿童中文书籍？

| 几乎没有 | 1 到 10 | 11 至 20 | 21 至 50 岁 | 50 岁以上 |
| --- | --- | --- | --- | --- |

- 您家里有多少本儿童英文书籍？

| 几乎没有 | 1 到 10 | 11 至 20 | 21 至 50 岁 | 50 岁以上 |
| --- | --- | --- | --- | --- |

**（8） 中英文休闲阅读和与学校**作业**相关的阅读。**

- 以休闲为目的，您用中文读给孩子听的頻率如何？

| 从不 | 每月一次 | 每周一次 | 每天一次 | 每天 1 次 |
| --- | --- | --- | --- | --- |

- 以学校作業为目的，你多常用中文读给孩子听的频率如何？

| 从不 | 每月一次 | 每周一次 | 每天一次 | 每天 1 次 |
| --- | --- | --- | --- | --- |

- 以休闲为目的，您用英文读给孩子听的频率如何？

| 从不 | 每月一次 | 每周一次 | 每天一次 | 每天 1 次 |
| --- | --- | --- | --- | --- |

- 以学校作业为目的，你用英文读给孩子听的頻率如何？

| 从不 | 每月一次 | 每周一次 | 每天一次 | 每天 1 次 |
| --- | --- | --- | --- | --- |

**Part III**

**Chinese oral vocabulary list (with English translation)**

1. 头发hair
2. 耳朵ear
3. 看see
4. 手hand
5. 苹果apple
6. 弟弟brother
7. 睡觉sleep
8. 吃eat
9. 鸡蛋egg
10. 钱money
11. 男man
12. 熊猫panda
13. 裤子pants
14. 生病sick
15. 药medicine
16. 弹钢琴play the piano
17. 钥匙keys
18. 眼镜eyeglasses
19. 葡萄grape
20. 春季spring season

**Chinese reading vocabulary list(with English translation)**

1. 米饭rice
2. 鸟bird
3. 西瓜watermelon
4. 再见see you
5. 哭cry
6. 医生doctor
7. 书包school bag
8. 牛奶milk
9. 安静quiet
10. 学习study
11. 太阳sun
12. 裙子dress
13. 雨伞umbrella
14. 游泳swim
15. 飞机airplane
16. 照顾care for
17. 图书馆library
18. 乒乓球pingpong
19. 游戏game
20. 排队queue

**English oral vocabulary list**

1. Farm
2. Roof
3. Peeking
4. Arrow
5. Picking
6. Furry
7. Violin
8. Vegetable
9. Hyena
10. Heart
11. Pigeon
12. Towing
13. Luggage
14. Kiwi
15. Interviewing
16. Rodent
17. Inhaling
18. Dilapidated
19. Pedestrian
20. Carpenter

**English reading vocabulary list**

1. Zipper
2. Desk
3. Knee
4. Hook
5. Map
6. Binoculars
7. Diving
8. Parachute
9. Tugging
10. Racket
11. Antlers
12. Compass
13. Pedal
14. Bouquet
15. Tropical
16. Triplets
17. Avocado
18. Orchard
19. Assembling
20. Speedometer

**Appendix B.**

***Parent interview questions***

English version:

1. What do you think of the relation between experiencing discrimination (or not) and children’s listening, speaking, reading and writing skills in Chinese?

2. What do you think of the relation between experiencing discrimination (or not) and children’s listening, speaking, reading and writing skills in English?

3. What do you think of the relation between experiencing discrimination (or not) and home literacy practice in Chinese?

4. What do you think of the relation between experiencing discrimination (or not) and home literacy practice in English?

5. What do you think of the relation between experiencing discrimination (or not) and child’s interest in reading Chinese?

6. What do you think of the relation between experiencing discrimination (or not) and child’s interest in reading English?

7. Are there any additional influences from the following factors on your child’s listening, speaking, reading and writing skills in Chinese? The factors are: weekend school experience (or not), school literacy educational experience, your cultural orientation (Chinese-, or American-, or bicultural orientation), and dialect background (Mandarin or non-Mandarin).

8. Are there any additional influences from the following factors on your child’s listening, speaking, reading and writing skills in English? The factors are: weekend school experience (or not), school literacy educational experience, your cultural orientation (Chinese-, or American-, or bicultural orientation), and dialect background (Mandarin or non-Mandarin).

9. Do you have any questions?

Chinese version:

1. 您认为您或您的家人是否遭受歧视与小孩的中文听力、口语、阅读和写作技巧之间有关系吗？

2. 您认为您或您的家人是否遭受歧视与小孩英语听力、口语、阅读和写作技能之间有关系吗？

3. 您认为您或您的家人是否遭受歧视与家庭成员间使用汉语交流及阅读之间有关系吗？

4. 您认为您或您的家人是否遭受歧视与家庭成员间使用英语交流及阅读之间有关系吗？

5. 您认为您或您的家人是否遭受歧视与孩子阅读中文的兴趣之间有关系吗？

6. 您认为您或您的家人是否遭受歧视与孩子阅读英语的兴趣之间有关系吗？

7. 以下因素是否对孩子的中文听力、口语、阅读和写作能力产生了其他影响？这些因素可能包括：有没有上中文学校的经历、学校识字教育体验、您的文化取向（中国化、美式或双文化方向）以及方言背景（普通话或非普通话）。

8. 以下因素对孩子的英语听力、口语、阅读和写作能力是否有其他影响？这些因素可能包括：有没有上中文学校的经历、学校识字教育体验、您的文化取向（中国化、美式或双文化方向）以及方言背景（普通话或非普通话）。

9. 您对我们的研究有没有问题？
